# Supplementary material for: High-density single-atomic Ni–N4 sites for efficient Fenton-like reactions
Source: Royal Society of Chemistry journal article supplement (doi:10.1039/d4ta05189k), 2024-01-01
Supplement: d4ta05189k1.pdf [file d4ta05189k1.pdf]

1

## Supporting information

### 2 **High-density single-atomic Ni-N<sub>4</sub> sites for efficient Fenton-like** 3 **reactions**

4 Shu-Qi Wang <sup>a,b</sup>, Katherine Velez <sup>a</sup>, Jiahui Cai <sup>a</sup>, Linbo Huang <sup>b</sup>, Qing-Hua Zhang  
5 <sup>d</sup>, Feng Feng <sup>a</sup>, Qi An <sup>a,\*</sup>, Lu Zhao <sup>a,\*</sup>, Jin-Song Hu <sup>b,c</sup>

6 <sup>a</sup> Beijing Key Laboratory of Materials Utilization of Nonmetallic Minerals and Solid Wastes,  
7 National Laboratory of Mineral Materials, School of Materials Science and Technology, China  
8 University of Geosciences, Beijing 100083, China

9 <sup>b</sup> Beijing National Laboratory for Molecular Sciences (BNLMS), CAS Key Laboratory of Molecular  
10 Nanostructure and Nanotechnology, Institute of Chemistry, Chinese Academy of Sciences (CAS),  
11 Beijing 100190, China

12 <sup>c</sup> University of Chinese Academy of Sciences, Beijing 100049, China

13 <sup>d</sup> Beijing National Research Center for Condensed Matter Physics, Collaborative Innovation  
14 Center of Quantum Matter, Institute of Physics, Chinese Academy of Sciences, Beijing 100190,  
15 China.

1

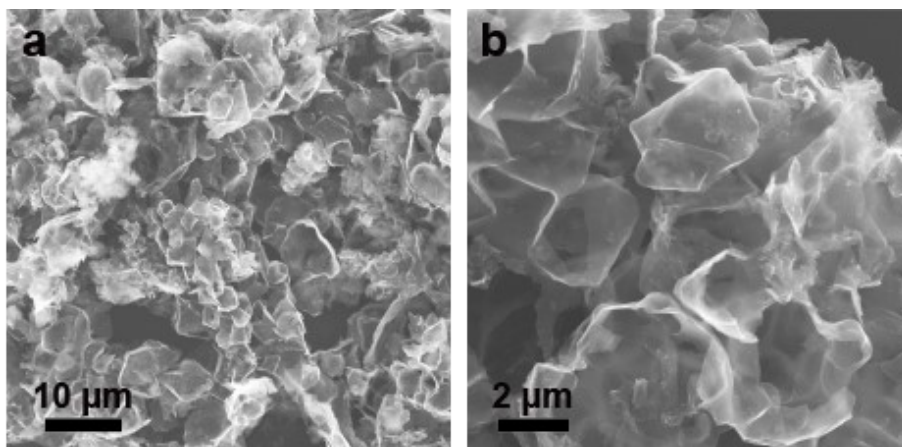

2

3

**Fig. S1** SEM images of nanoporous carbon with different scale bars.

4

5

6

7

8

9

10

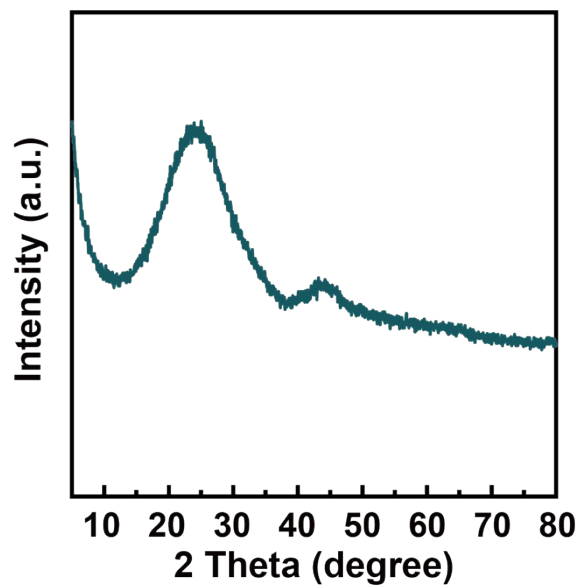

11

12

13

**Fig. S2** XRD pattern of nanoporous carbon support.

1

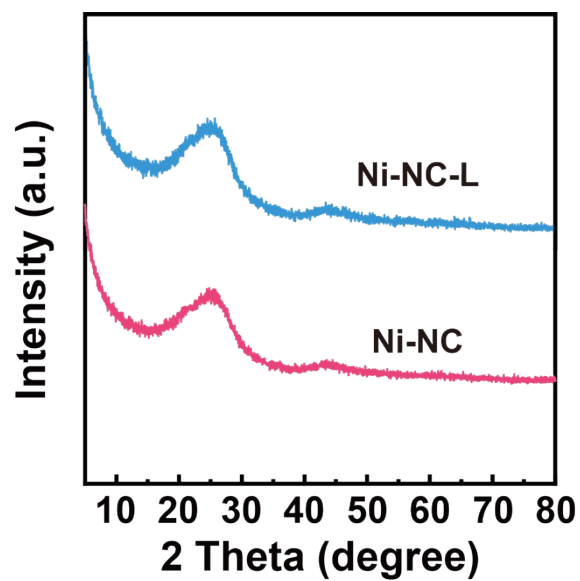

2

3 **Fig. S3** XRD patterns of Ni-NC-L and Ni-NC catalysts.

4

5

6

7

8

9

10

11

12

13

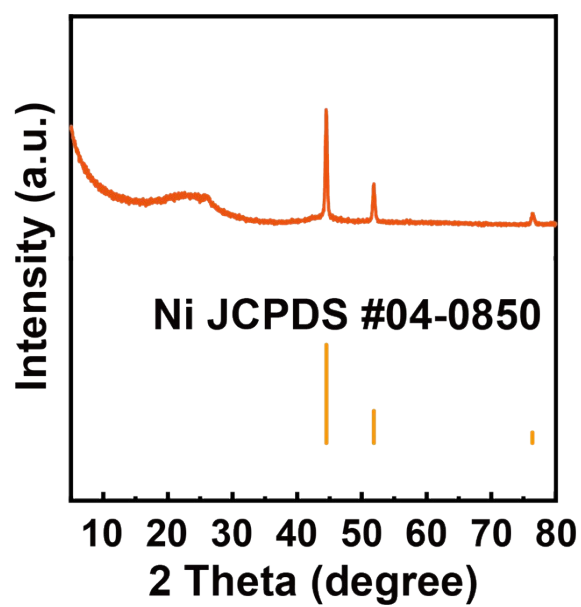

14

15 **Fig. S4** XRD pattern of Ni NPs/C.

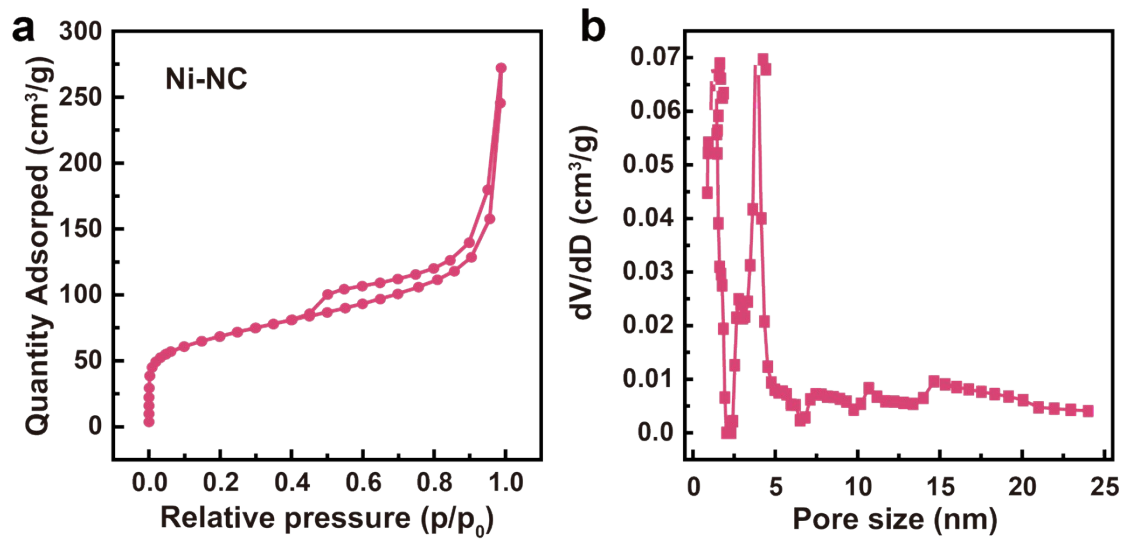

1

2 **Fig. S5** a, N<sub>2</sub> adsorption-desorption isotherm, and b, corresponding pore size  
3 distribution curve of Ni-NC.

1

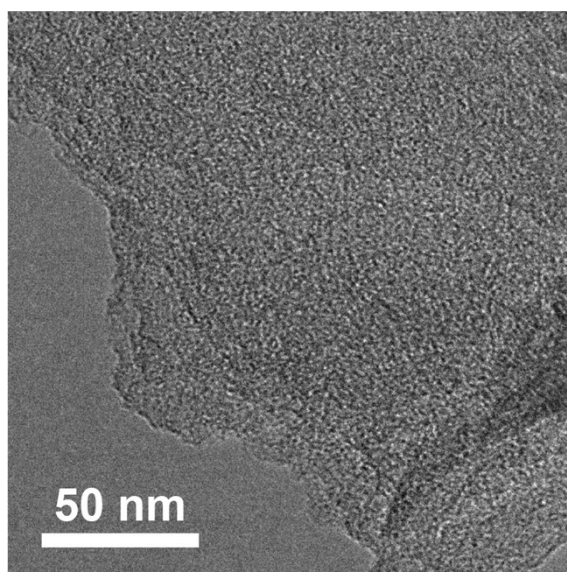

2

3 **Fig. S6** TEM image of Ni-NC-L.

4

5

6

7

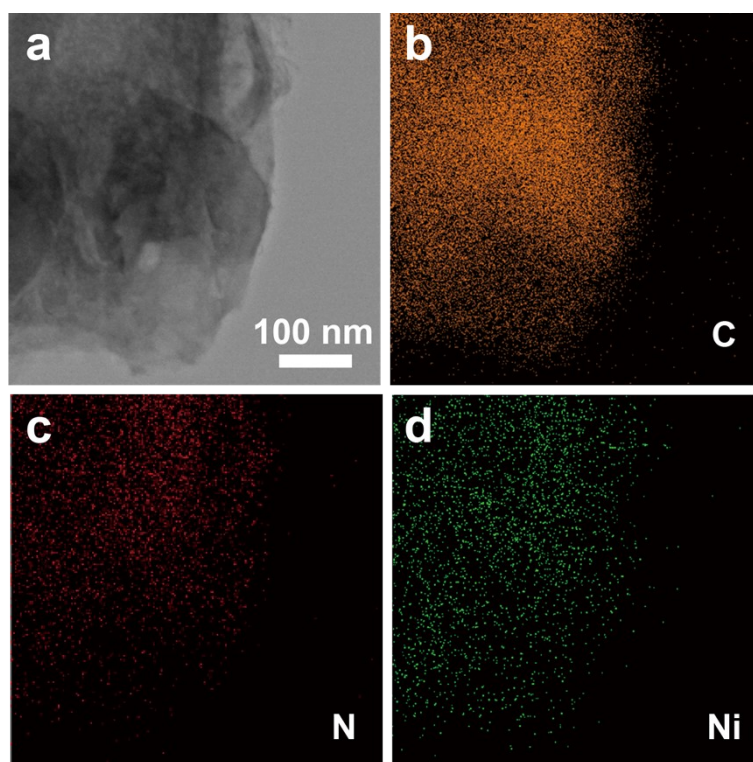

8

9 **Fig. S7** EDS mapping images of Ni-NC-L.

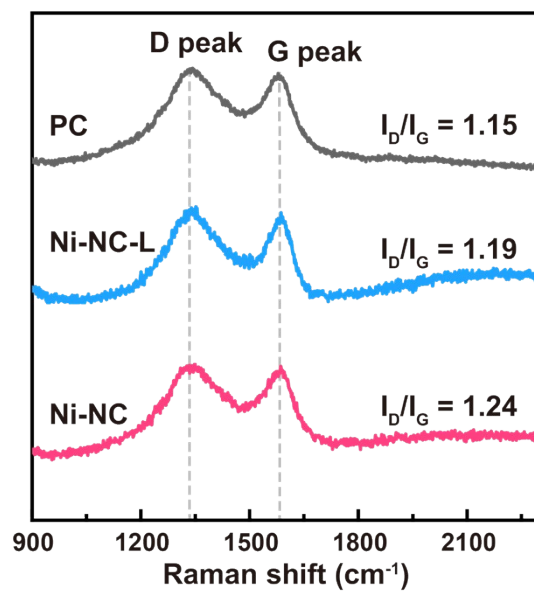

1

2 **Fig. S8** Raman spectra of Ni-NC, Ni-NC-L and PC.

3

4

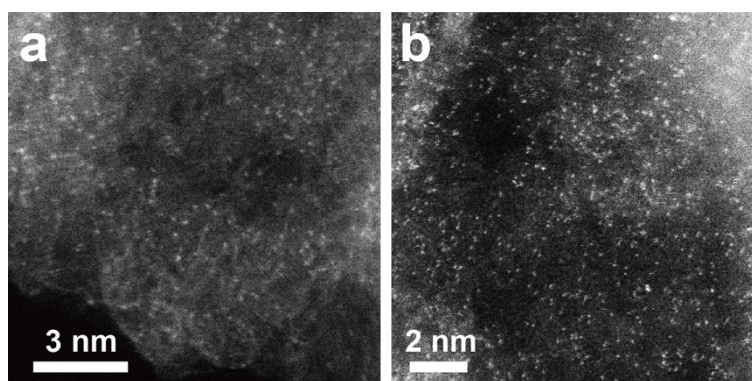

5

6 **Fig. S9** HAADF-STEM images of Ni-NC.

7

8

9

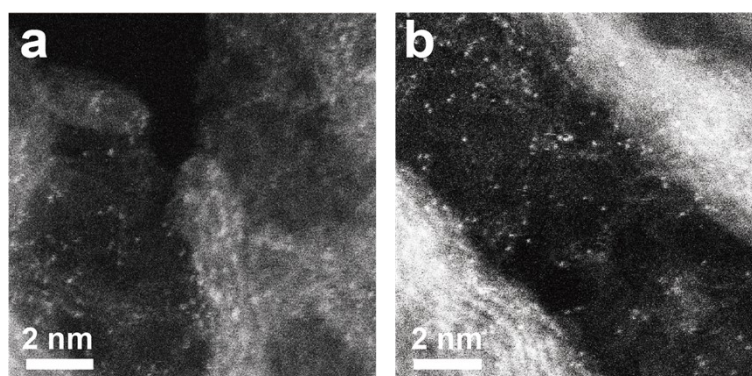

10

11 **Fig. S10** HAADF-STEM images of Ni-NC-L.

12

13

14

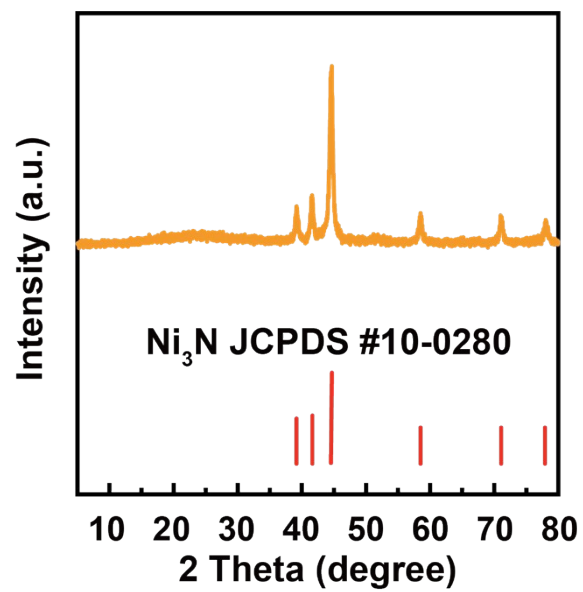

1

2 **Fig. S11** XRD pattern of Ni<sub>3</sub>N/C.

3

4

5

6

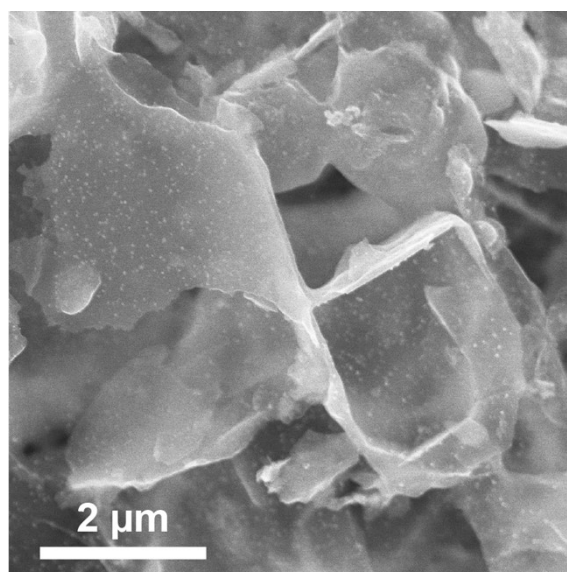

7

8 **Fig. S12** SEM image of Ni<sub>3</sub>N/C.

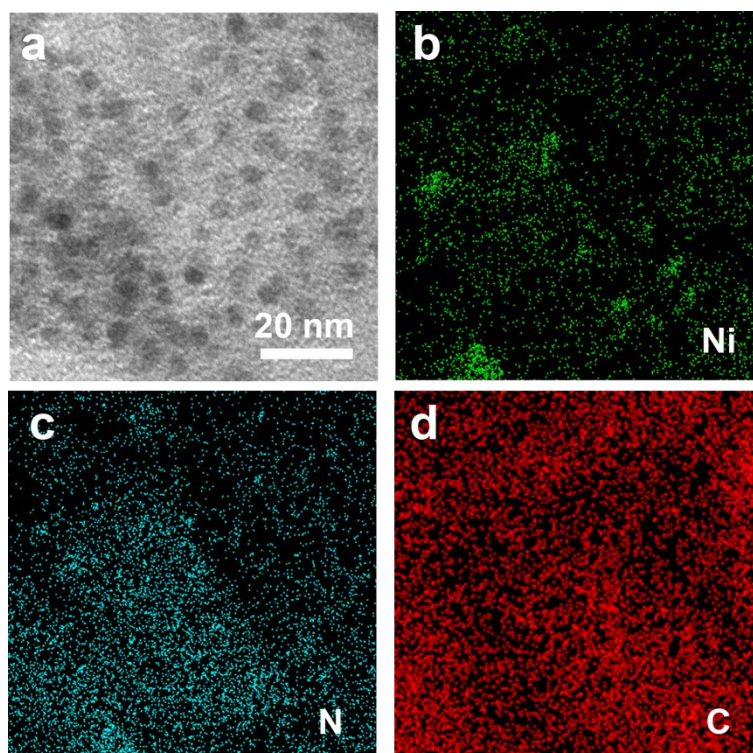

1  
2 **Fig. S13** EDS mapping images of  $\text{Ni}_3\text{N}/\text{C}$ .  
3  
4  
5

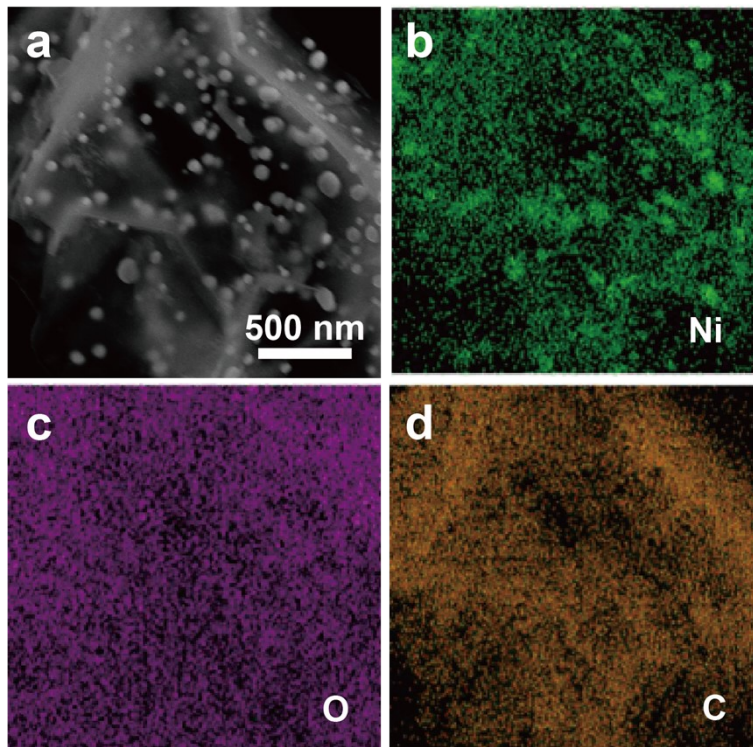

6  
7 **Fig. 14** SEM, and EDS mapping images of  $\text{NiO}/\text{C}$ .



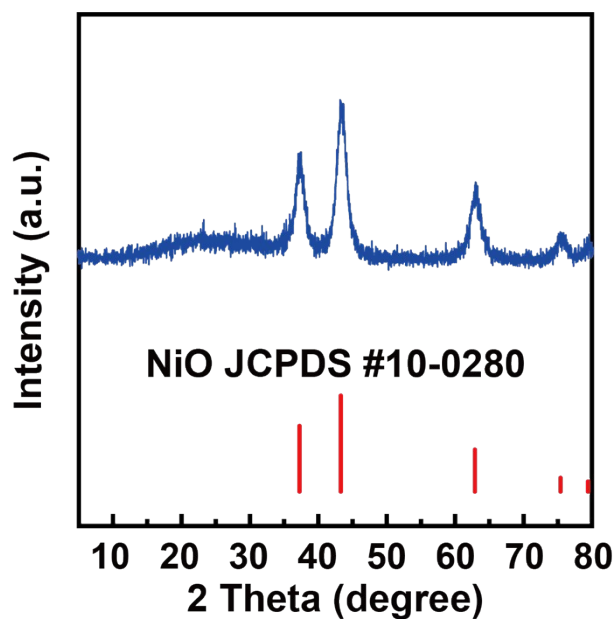

1  
2 **Fig. S15** XRD pattern of NiO/C.  
3  
4

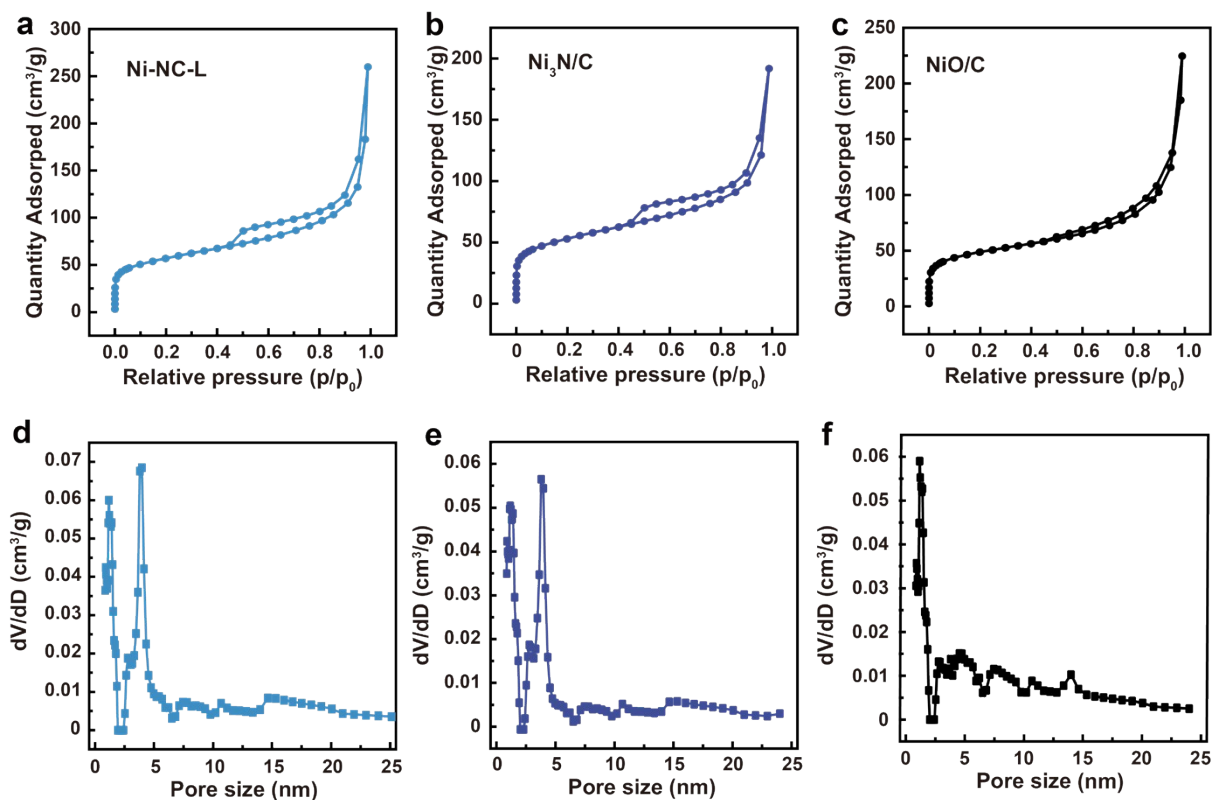

5  
6 **Fig. S16** N<sub>2</sub> adsorption-desorption isotherms of Ni-NC-L (a), Ni<sub>3</sub>N/C (b) and NiO/C (c),  
7 and corresponding pore size distribution curves of Ni-NC-L (d), Ni<sub>3</sub>N/C (e) and NiO/C  
8 (f).

1

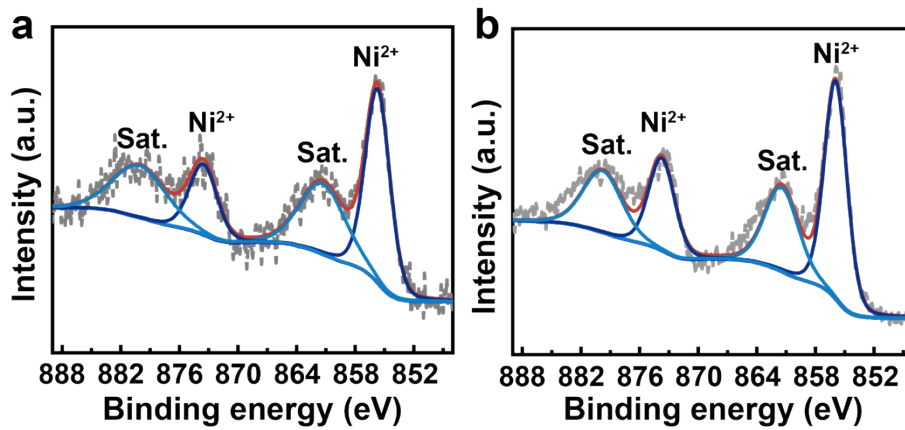

2

3 **Fig. S17** XPS Ni 2p spectra of (a) Ni-NC-L and (b) Ni-NC catalysts.

4

5

6

7

8

9

10

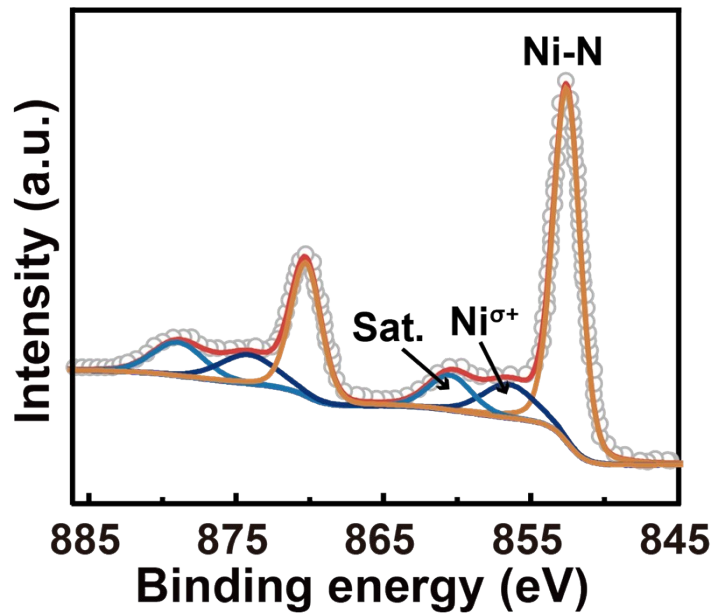

11

12 **Fig. S18** Ni 2p XPS spectrum of Ni<sub>3</sub>N/C. The appearance of Ni<sup>σ+</sup> is the result of the  
13 oxidation of the catalyst when exposed to air.

1

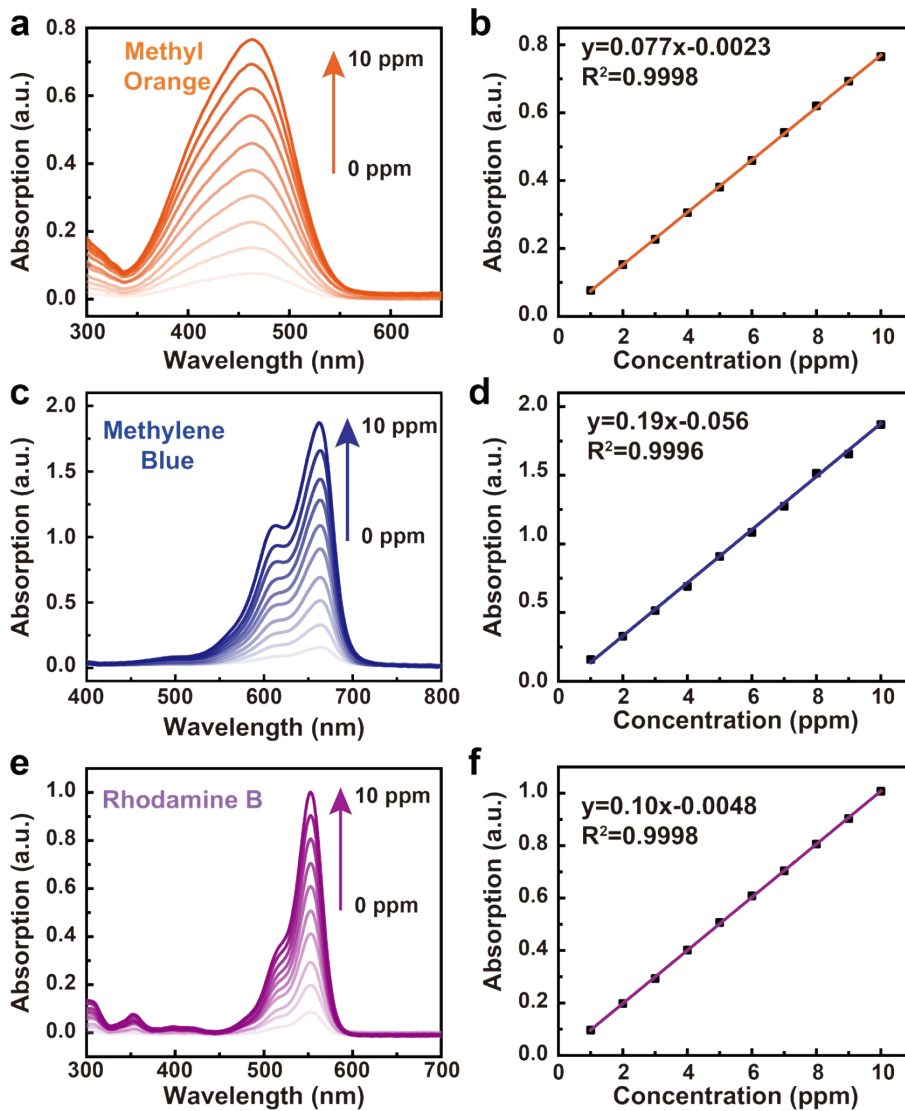

2

3 **Fig. S19** Absorbance spectra of dye solutions at various concentrations, (a) MO, (c)  
4 MB, and (e) RhB. Linear correlation of the absorbance intensity to (b) MO  
5 concentration, (d) MB concentration, and (f) RhB concentration.

1

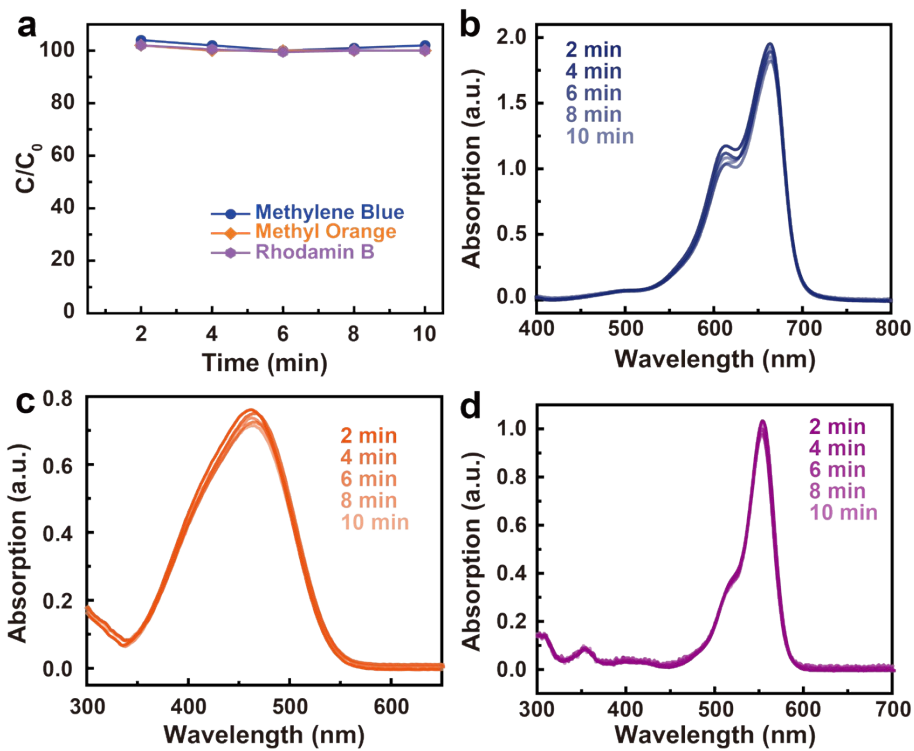

2

3 **Fig. S20** (a) The dye concentration after adsorption saturation and the absorbance  
4 spectra of dye solutions, MO (b), MB (c), and RhB (d).

5

6

7

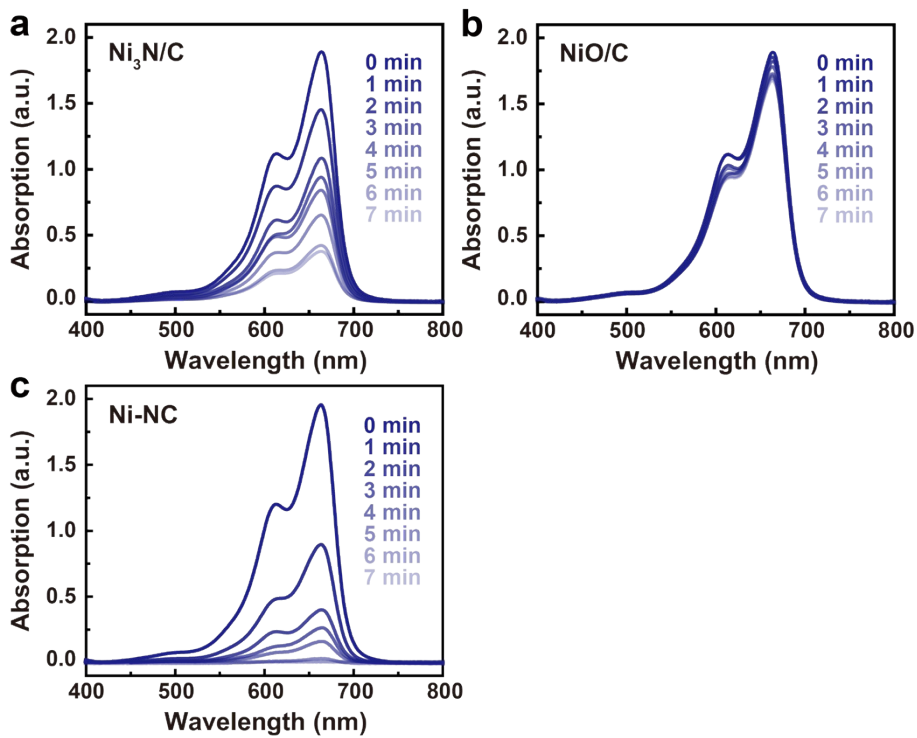

8

9 **Fig. S21** The absorbance spectra correspond to the MB solution concentration under  
10 the Fenton-like performance of  $Ni_3N/C$ ,  $NiO/C$ , and  $Ni-NC$ .

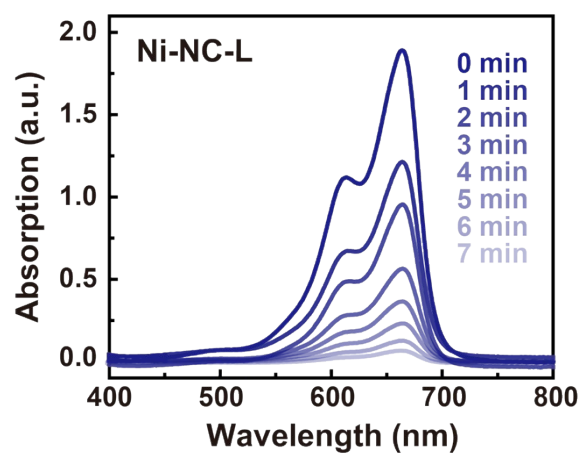

1

2 **Fig. S22** The absorbance spectra correspond to the MB solution concentration under  
 3 the Fenton-like performance of Ni-NC-L.

4

5

6

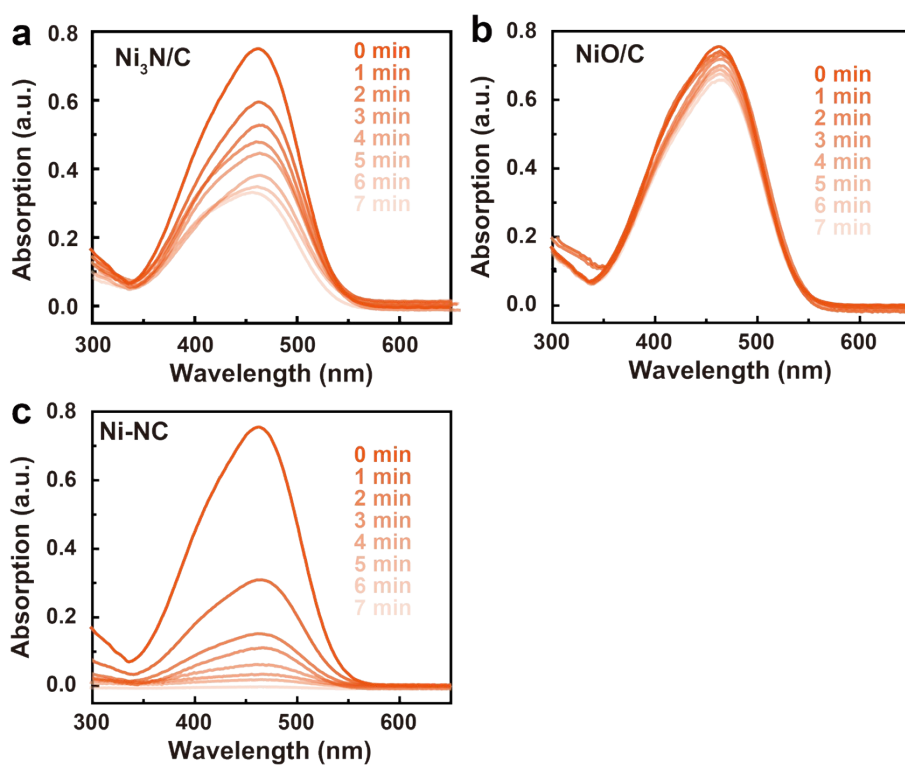

7

8 **Fig. S23** The absorbance spectra correspond to the MO solution concentration under  
 9 the Fenton-like performance of Ni<sub>3</sub>N/C, NiO/C, and Ni-NC.

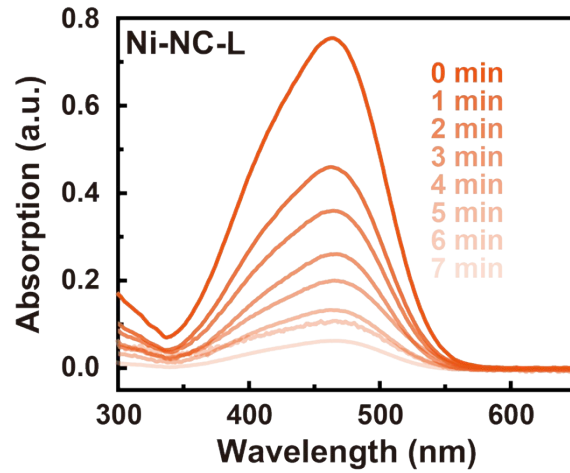

1

2 **Fig. S24** The absorbance spectra correspond to the MO solution concentration under  
3 the Fenton-like performance of Ni-NC-L.

4

5

6

7

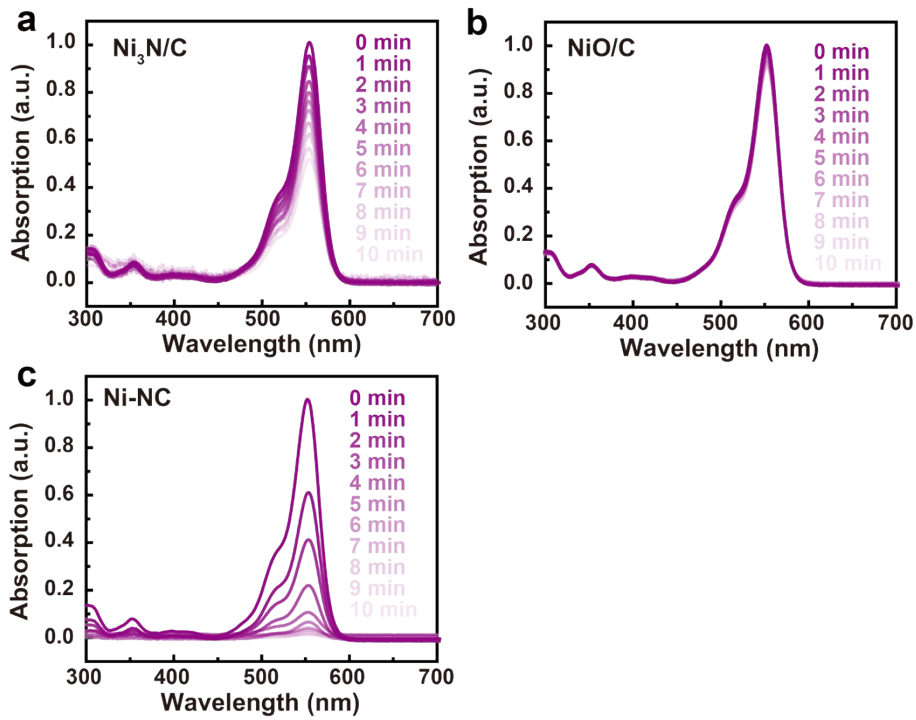

8

9 **Fig. S25** The absorbance spectra correspond to the RhB solution concentration under  
10 the Fenton-like performance of Ni<sub>3</sub>N/C, NiO/C, and Ni-NC.

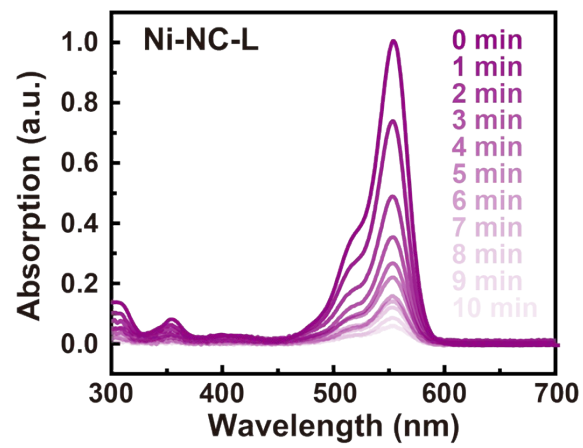

1

2 **Fig. S26** The absorbance spectra correspond to the RhB solution concentration under  
3 the Fenton-like performance of Ni-NC-L.

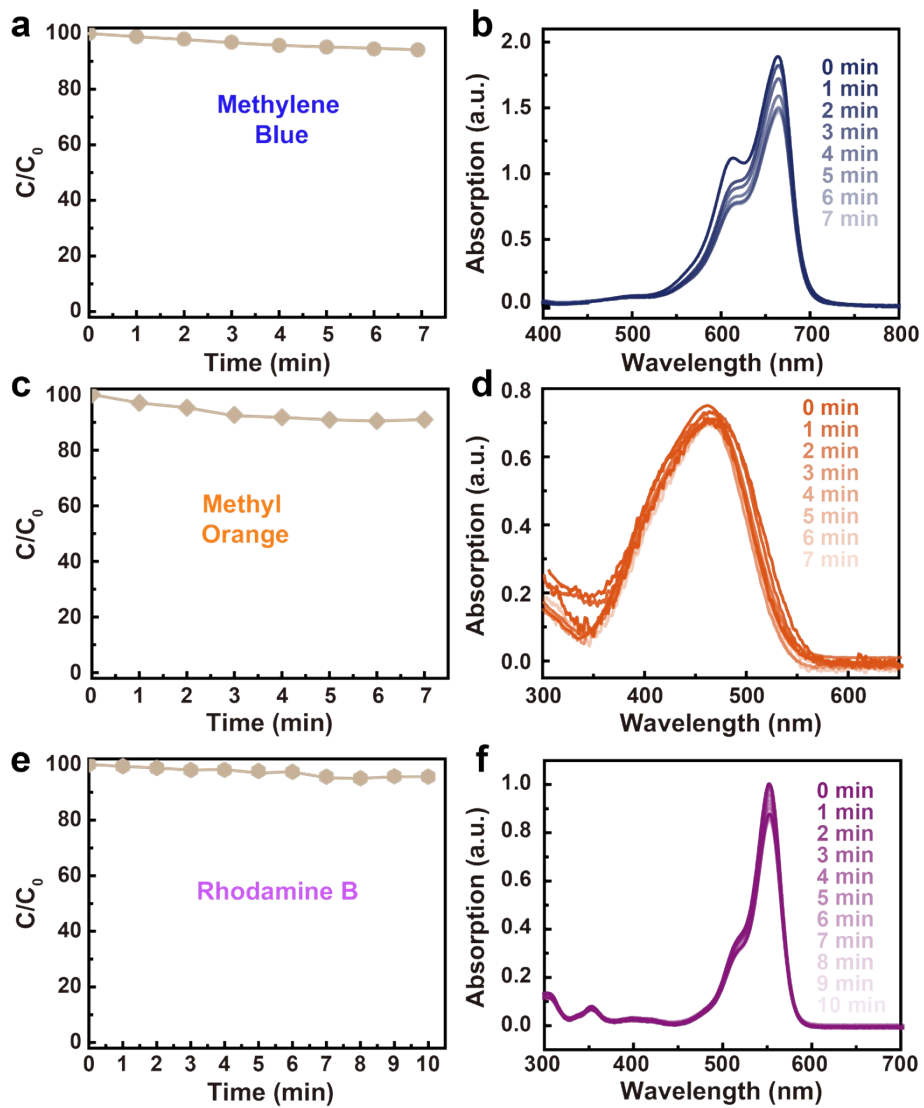

1  
2 **Fig. S27** Fenton-like performance of NC for various dye solutions, MB (a), MO (c), and  
3 RhB (e), and the corresponding absorbance spectra correspond to the dye solution  
4 concentration  
5  
6



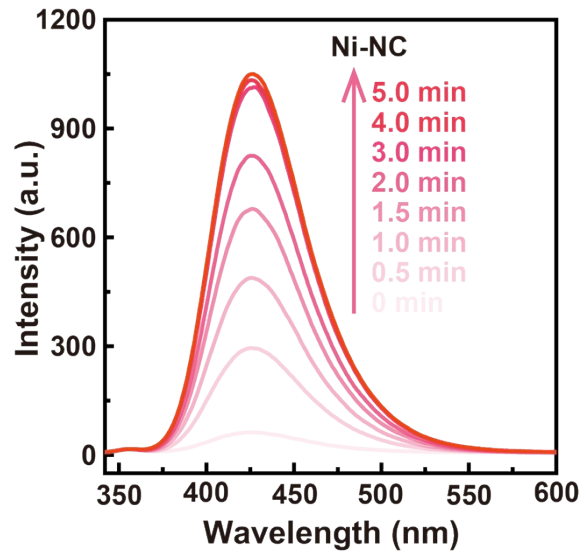

1

2 **Fig. S28** The  $\bullet\text{OH}$  generation of Ni-NC by using TA as a probe during different time.

3

4

5

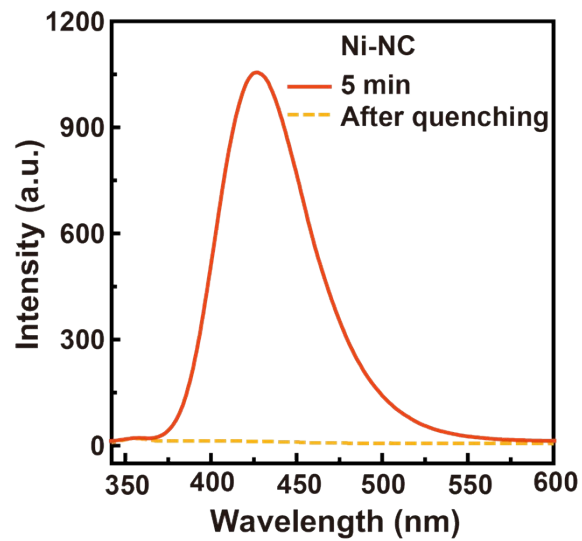

6

7 **Fig. S29** Comparison of  $\bullet\text{OH}$  generation of Ni-NC under MB degradation condition  
8 and after quenching.

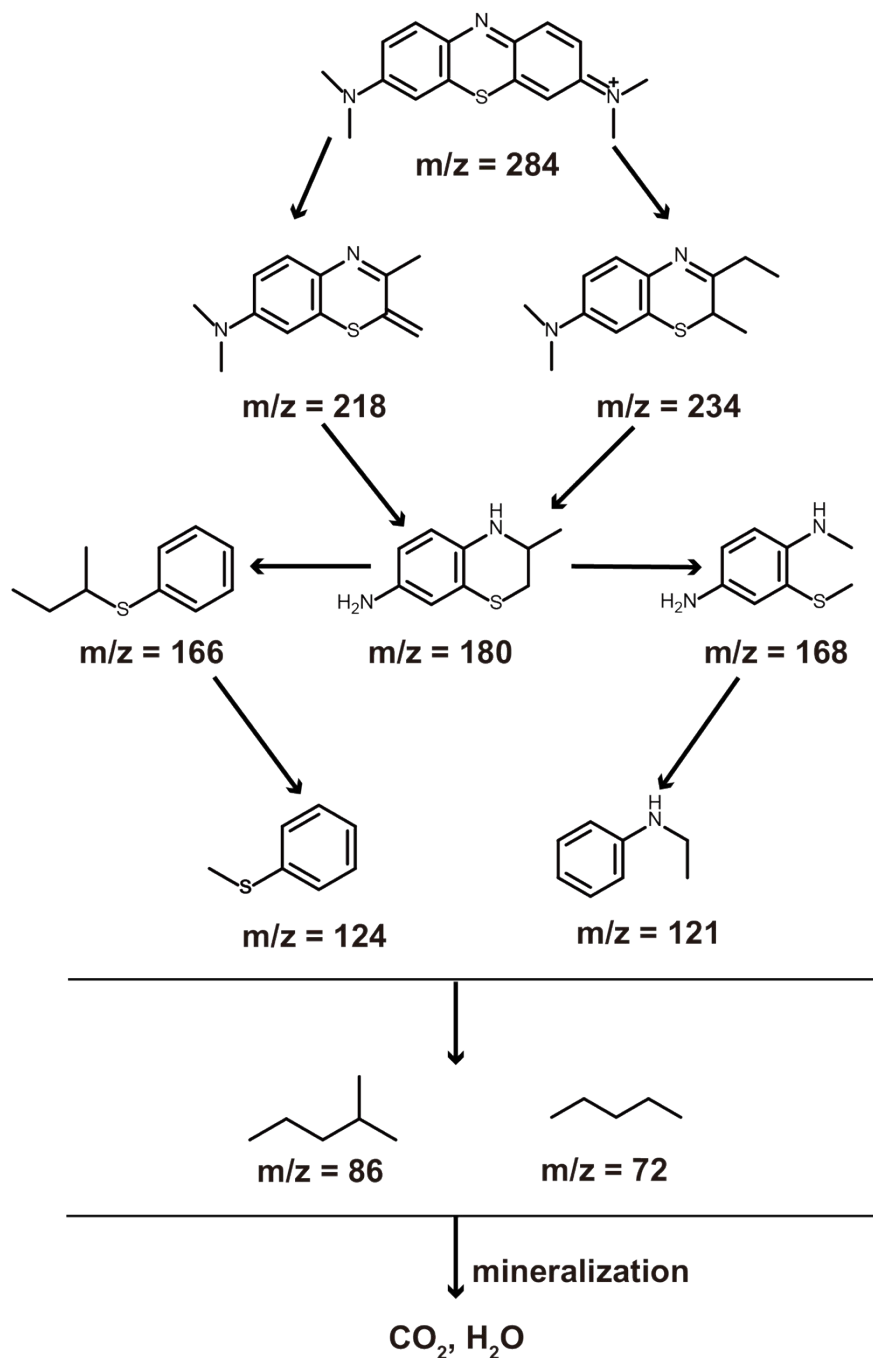

1

2 **Fig. S30** Probable degradation pathway of MB.

3 Note: This degradation pathway is based on the analysis of the major peaks in the

4 LC-MS chromatograms. Other non-detected reaction intermediates might also exist.

5 The reaction intermediate for a certain m/z value shown here is just a selection

6 among numerous possible molecules, especially for the intermediates of small m/z

7 values.

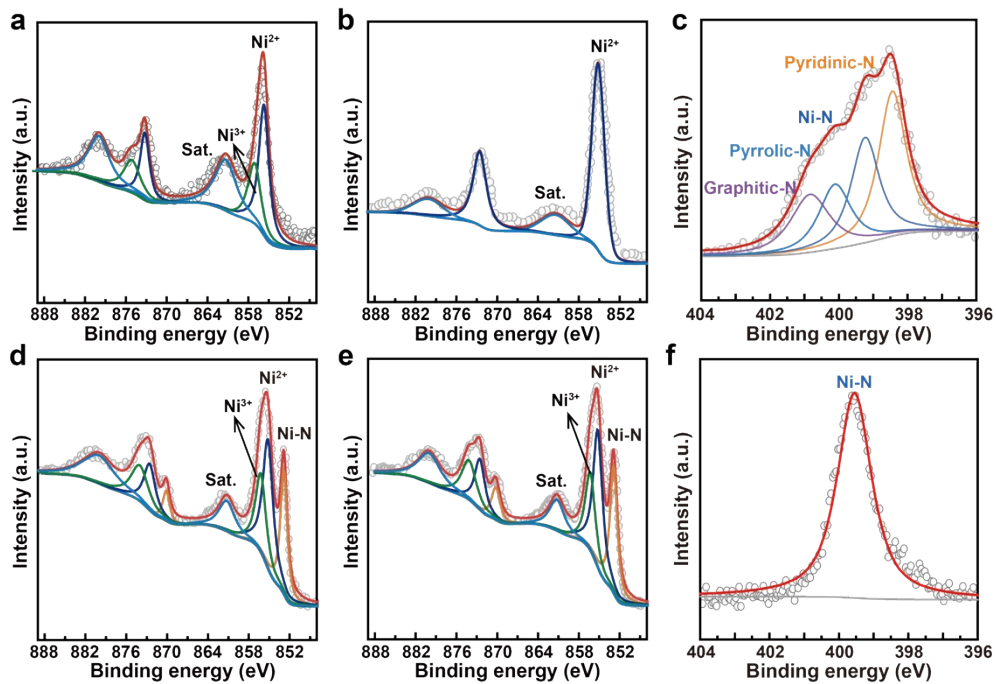

1

2 **Fig. S31** XPS spectra of catalysts at various process. Ni 2p spectra of the catalysts  
 3 when H<sub>2</sub>O<sub>2</sub> was activated, (a) Ni-NC and (d) Ni<sub>3</sub>N/C. Ni 2p spectra of the catalyst  
 4 catalysts when adequate MB was degradation, (b) Ni-NC and (e) Ni<sub>3</sub>N/C, and the  
 5 corresponding N 1s spectra of (c) Ni-NC and (f) Ni<sub>3</sub>N/C.

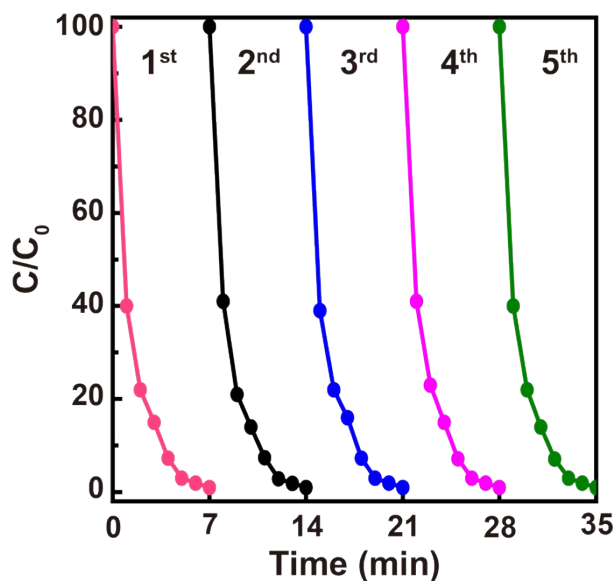

1  
2  
3  
4  
5  
6  
7

**Fig. S32** The cyclic test of MB degradation reactions of Ni-NC.

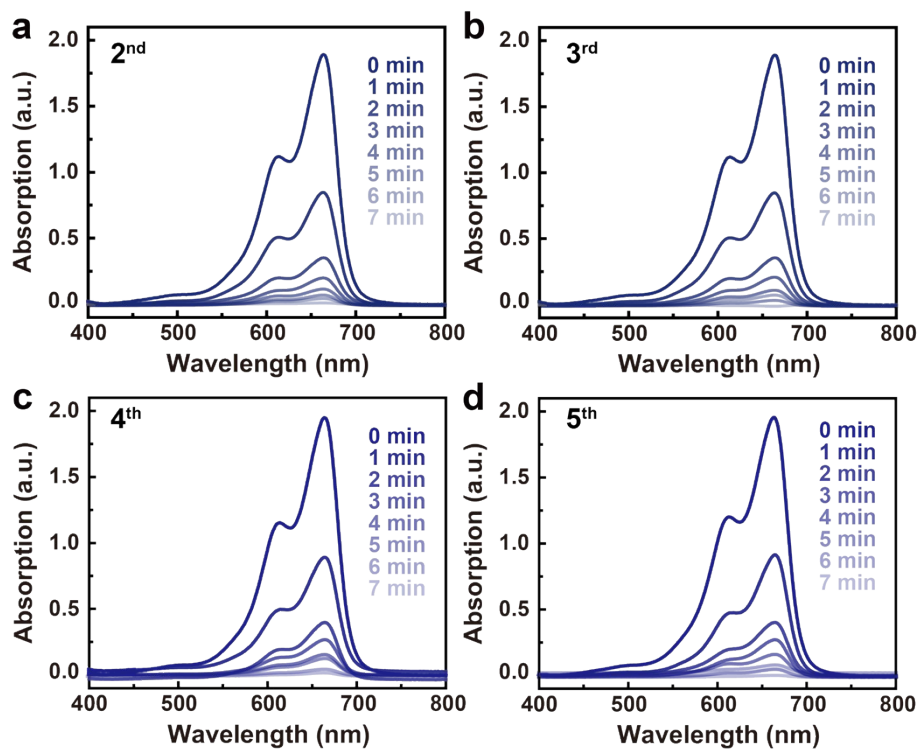

8  
9 **Fig. S33** The absorbance spectra correspond to the MB solution concentration under  
10 the Fenton-like performance of Ni-NC during 5 cycles.

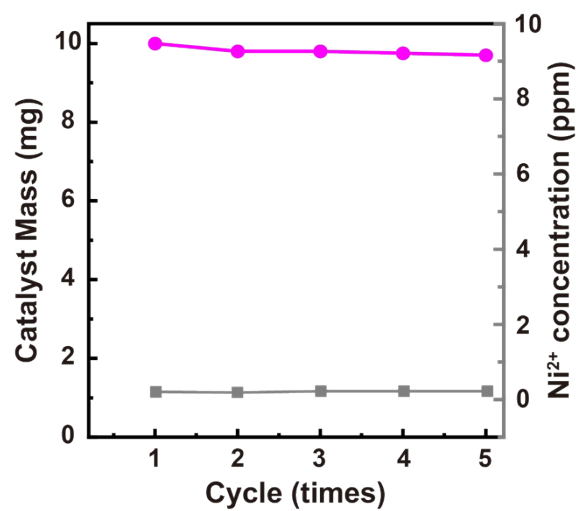

1

2 **Fig. S34** The mass of Ni-NC and Ni<sup>2+</sup> leaching concentration of Ni-NC during 5 cycles.

1 **Table S1.** The Ni content of all catalysts.

| Catalysts           | Ni content (wt.%) |
|---------------------|-------------------|
| Ni-NC-L             | 5.1               |
| Ni-NC               | 9.3               |
| Ni NPs/C            | 12.3              |
| Ni <sub>3</sub> N/C | 10.2              |
| NiO/C               | 15.6              |

1 **Table S2.** Parameters of EXAFS fittings for Ni-NC, Ni<sub>3</sub>N/C, and reference samples (Ni  
2 foil and NiPc).

| Sample              | Shell | N <sup>a</sup> | R (Å) <sup>b</sup> | $\sigma^2 \cdot 10^{-3}$ (Å <sup>2</sup> ) <sup>c</sup> | $\Delta E_0$ (eV) <sup>d</sup> | R factor |
|---------------------|-------|----------------|--------------------|---------------------------------------------------------|--------------------------------|----------|
| Ni-NC               | Ni-N  | 4.0±0.7        | 1.41               | 7.5±0.6                                                 | 5.9                            | 0.0013   |
| Ni <sub>3</sub> N/C | Ni-N  | 1.7±0.7        | 1.42               | 6.4±0.5                                                 | 4.6                            | 0.0018   |
|                     | Ni-Ni | 10.3±0.7       | 2.29               | 9.5±0.8                                                 |                                |          |
| Ni foil             | Ni-Ni | 12             | 2.21               | 7.9±0.9                                                 | 5.1                            | 0.0019   |
| NiPc                | Ni-N  | 4.1±0.8        | 1.48               | 9.6±0.8                                                 | 3.9                            | 0.0012   |

3 <sup>a</sup>N: coordination numbers; <sup>b</sup>R: bond distance; <sup>c</sup> $\sigma^2$ : Debye-Waller factors; <sup>d</sup> $\Delta E_0$ : the  
4 inner potential correction;  $S_0^2=0.78$ .

1 **Table S3.** The comparison of catalytic performances for the recently reported  
 2 Fenton-like catalysts.

| Catalysts                        | Contaminant | $m_{\text{catalyst}}$<br>(mg) | $C_{\text{MB}}$<br>(ppm) | $C_{\text{H}_2\text{O}_2}$<br>(ppm) | $k$<br>( $\text{min}^{-1}$ ) | Ref.      |
|----------------------------------|-------------|-------------------------------|--------------------------|-------------------------------------|------------------------------|-----------|
| Ni-NC                            | MB          | 10                            | 20                       | 10                                  | 0.767                        | This work |
| Ni-NC                            | MO          | 10                            | 20                       | 10                                  | 0.641                        | This work |
| Ni-NC                            | RhB         | 10                            | 20                       | 10                                  | 0.592                        | This work |
| Fe@N-C-800                       | MB          | 10                            | 50                       | 34                                  | 1.2                          | [1]       |
| Fe@N-C-800                       | RhB         | 10                            | 50                       | 34                                  | 0.38                         | [1]       |
| Cu/NC-MMT                        | RhB         | 20                            | 20                       | 800                                 | 0.595                        | [2]       |
| Cu-C <sub>3</sub> N <sub>4</sub> | RhB         | 10                            | 10                       | 1000                                | 1.64                         | [3]       |
| MSO-12                           | MB          | 10                            | 50                       | 27                                  | 0.995                        | [4]       |
| SA-Rh/NC                         | RhB         | 10                            | 60                       | /                                   | 0.103                        | [5]       |
| Fe-MG                            | MB          | /                             | 20                       | 13.6                                | 0.231                        | [6]       |
| Co/Cu/zeolite                    | RhB         | /                             | 10                       | 1020                                | 0.053                        | [7]       |
| Fe-BDC <sub>1</sub>              | RhB         | /                             | 20                       | 1440                                | 0.09                         | [8]       |
| Fe SA/NPCs                       | RhB         | /                             | 25                       | /                                   | 19.657                       | [9]       |



## 1 **References**

- 2 1 L. Wang, L. Rao, M. Ran, Z. Wu, W. Song, Z. Zhang, H. Li, Y. Yao, W. Lv and M. Xing,  
3 *Nat. Commun.* 2023, **14**, 7841.
- 4 2 C. Gu, S. Wang, A. Zhang, C. Liu, J. Jiang and H. Yu, *Proc. Natl. Acad. Sci. U.S.A.*  
5 2023, **120**, e2311585120.
- 6 3 J. Xu, X. Zheng, Z. Feng, Z. Lu, Z. Zhang, W. Huang, Y. Li, D. Vuckovic, Y. Li, S. Dai, G.  
7 Chen, K. Wang, H. Wang, J. K. Chen, W. Mitch and Y. Cui, *Nat. Sustain.* 2021, **4**, 233-  
8 241.
- 9 4 Y. Zheng, L. Wang, L. Zhang, H. Zhang and W. Zhu, *Nano Res.* 2022, **15**, 2977-2986.
- 10 5 S. Hu, J. Guan, R. Ma, Y. Tao, D. Liu, J. Gong and Y. Xiong, *Rare Metals* 2024, **43**,  
11 2331-2338.
- 12 6 M. Zhou, W. Zhang, Z. Li, T. Feng, S. Lan, Z. Peng and S. Chen, *Rare Metals* 2023, **42**,  
13 3443-3454.
- 14 7 X. Zhang, D. Ma and X. Zhu, *Environ. Eng. Res.* 2024, **29**, 230095-230104.
- 15 8 Q. Wu, M. Siddique, Y. Yang, M. Wu, L. Kang and H. Yang, *J. Clean. Prod.* 2022, **374**,  
16 134033.
- 17 9 L. Yang, H. Yang, S. Yin, X. Wang, M. Xu, G. Lu, Z. Liu and H. Sun, *Small* 2022, **18**,  
18 2104941.
